# Supplementary material for: PRRSV Non-Structural Proteins Orchestrate Porcine E3 Ubiquitin Ligase RNF122 to Promote PRRSV Proliferation
Source: MDPI journal article supplement (doi:10.3390/v14020424), 2022-02-18
Supplement: s1 [file s1]

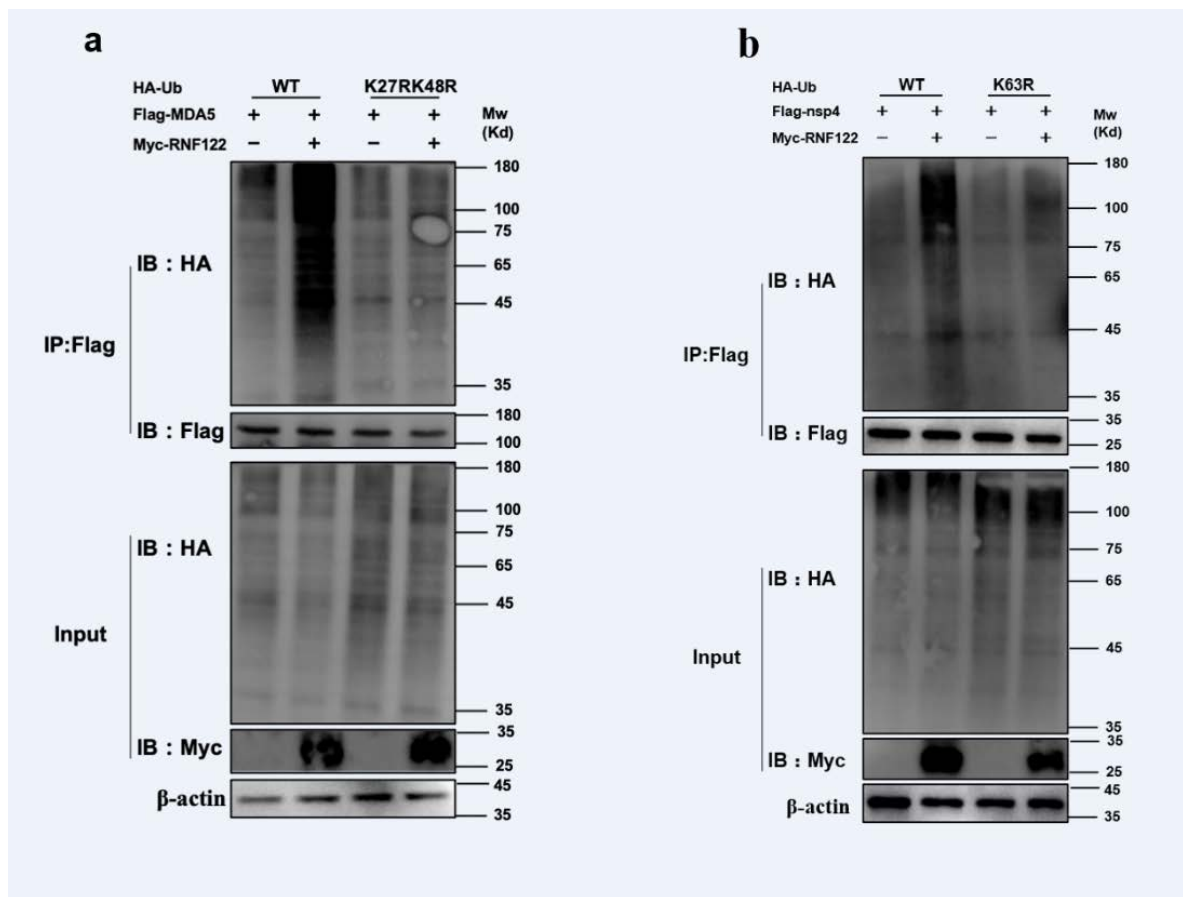

**Figure S1.** Porcine RNF122 performed K27-linked and K48-linked ubiquitination to MDA5 and mediate K63-linked ubiquitination to nsp4. (a) HEK293T cells were co-transfected with Myc-RNF122, Flag-MDA5 and HA-Ub (WT), HA-Ub (K27RK48R). 24 h after transfection, Flag Beads were used for CO-IP, and further detected by Western blotting with an anti-HA, an anti-Flag antibody and an anti-Myc antibody, respectively. (b) HEK293T cells were co-transfected with Myc-RNF122, Flag-nsp4 and HA-Ub (WT), HA-Ub (K63R). 24 h after transfection, Flag Beads were used for CO-IP, and further detected by Western blotting with an anti-HA, an anti-Flag antibody and an anti-Myc antibody, respectively.
